# Supplementary material for: HHLA2 promotes tumor progression by long non-coding RNA H19 in human gallbladder cancer
Source: PubMed Central journal article supplement — Int J Oncol. 2022 Aug 1;61(3):112. doi: 10.3892/ijo.2022.5402 (PMC9374468; doi:10.3892/ijo.2022.5402), 2022-08-01

Figure S1. (A) Information on the viral vector. (B) The construction of a stable lncKRT16P6 knockdown cell line was confirmed by fluorescence analysis. (C) lncKRT16P6 expression in CAL-27 and SCC-9 cells transduced with lncKRT16P6 shRNA was examined by reverse transcription-quantitative PCR analysis. \*\*\* $P < 0.001$ . Long noncoding RNA; sh, short hairpin; NC, negative control.

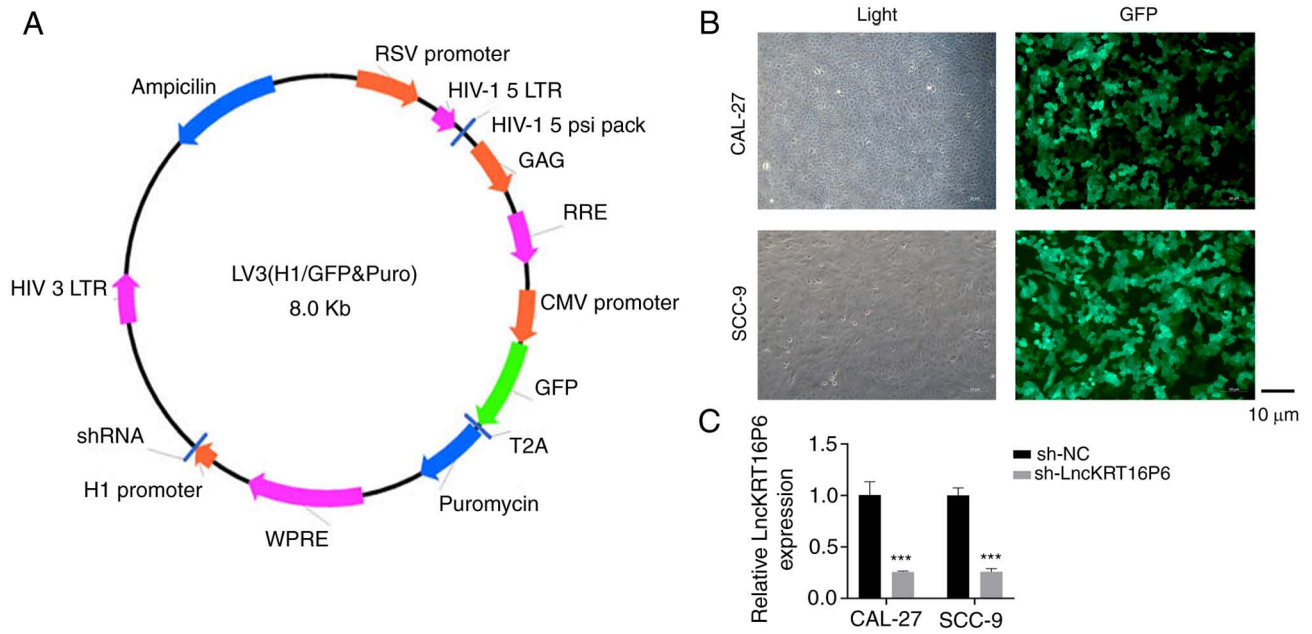

Figure S2. (A) miR-3180 expression in CAL-27 and SCC-9 cells transduced with miR-3180 inhibitor was examined by RT-qPCR analysis. (B) miR-3180 expression in CAL-27 and SCC-9 cells transduced with miR-3180 mimics was examined by RT-qPCR analysis. (C) GATAD2A expression in CAL-27 and SCC-9 cells transduced with GATAD2A siRNAs were examined by RT-qPCR analysis. \*\*P<0.01, \*\*\*P<0.001. miR, microRNA; RT-qPCR, reverse transcription-quantitative PCR; GATAD2A, GATA zinc finger domain containing 2A.

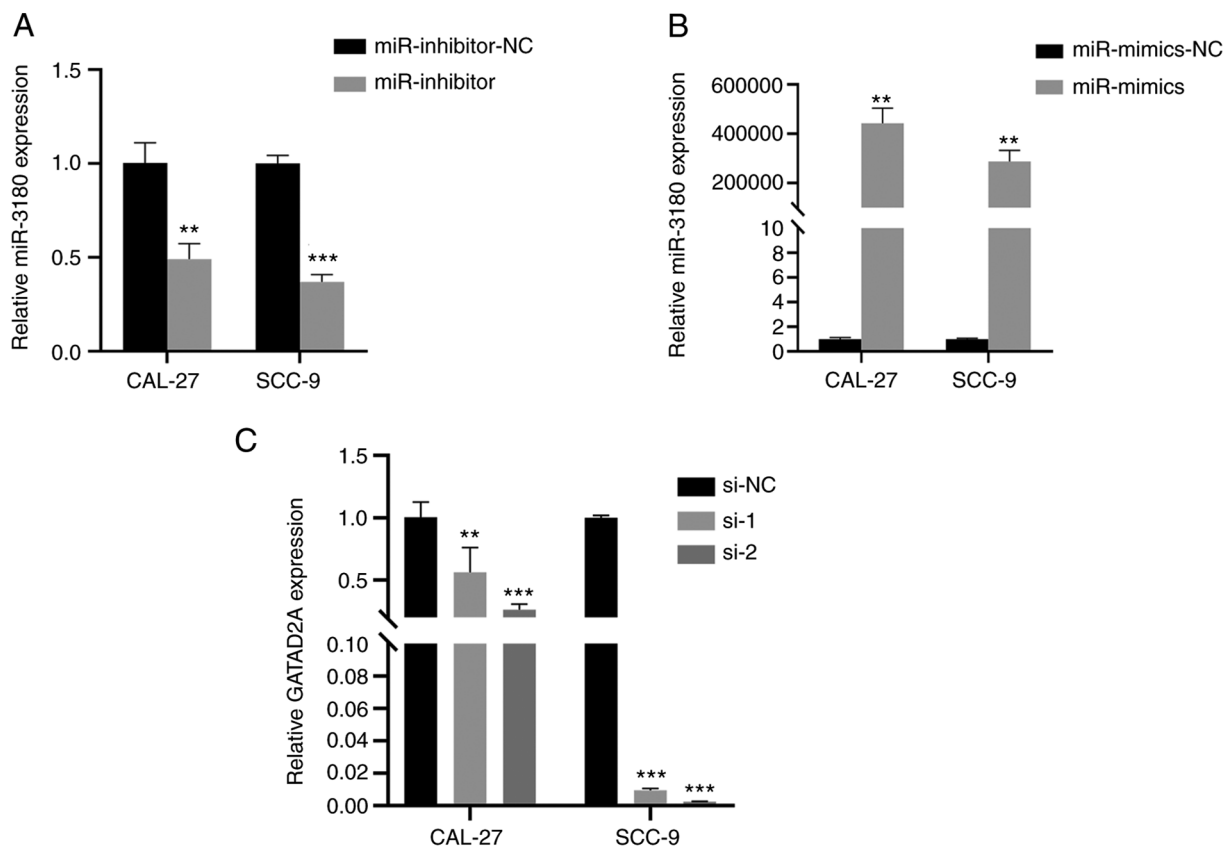

Supplement: Supplementary_Data1.pdf [file Supplementary_Data1.pdf]
