# Supplementary material for: HHLA2 promotes tumor progression by long non-coding RNA H19 in human gallbladder cancer
Source: PubMed Central journal article supplement — Int J Oncol. 2022 Aug 1;61(3):112. doi: 10.3892/ijo.2022.5402 (PMC9374468; doi:10.3892/ijo.2022.5402), 2022-08-01
Supplement: Supplementary_Data2.pdf [file Supplementary_Data2.pdf]

Table SI. Primer sequences used for reverse transcription-quantitative PCR.

| Primer name            | Sequences (5'-3')                                                                                                  |
|------------------------|--------------------------------------------------------------------------------------------------------------------|
| lncKRT16P6             | F: CGAGGATGCCCAATGAGTCT<br>R: GAGGAGGAGAGGCTGTGAAG                                                                 |
| miR-3180               | F: ATATCGTGGGGCGGAGCTT<br>R: AGTGCAGGGTCCGAGGTATT<br>RT:<br>GTCGTATCCAGTGCAGGGTCCGAGGTA<br>TTCGCACTGGATACGACCTCCGG |
| miR-mimics NC          | F: UUCUCCGAACGUGUCACGUTT<br>R: ACGUGACACGUUCGGAGAATT                                                               |
| hsa-miR-3180 mimics    | F: UGGGGCGGAGCUUCCGGAG<br>R: CCGGAAGCUCCGCCCAU                                                                     |
| miR-inhibitor NC       | CAGUACUUUUGUGUAGUACAA                                                                                              |
| hsa-miR-3180 inhibitor | CUCCGGAAGCUCCGCCCA                                                                                                 |
| GATAD2A                | F: AATCCACAGCATTAGGCAACATT<br>R: GATGATCCTCTGTCCCTGAATCT                                                           |
| GAPDH                  | F: CACCCACTCCTCCACCTTTGA<br>R: TCTCTCTTCCTCTTGTGCTCTTGC                                                            |
| U6                     | F: CTCGCTTCGGCAGCACA<br>R: AACGCTTCACGAATTTGCGT                                                                    |

lnc, long noncoding; miR, microRNA; NC, negative control; F, forward; R, reverse.

Table SII. Sequences of the si/shRNAs.

| siRNAs          | Sequences (5'-3')                                                                                                                                            |
|-----------------|--------------------------------------------------------------------------------------------------------------------------------------------------------------|
| si-NC           | F: UUCUCCGAACGUGUCACGUTT<br>R: ACGUGACACGUUCGGAGAATT                                                                                                         |
| lncKRT16P6-si-1 | F: CCAGCUCAGCAUAAAGCAUTT<br>R: AUGCUUUAUGCUGAGCUGGGA                                                                                                         |
| lncKRT16P6-si-2 | F: GCAAUCAAUACAGCUUCAUTT<br>R: AUGAAGCUGUAUUGAUUGCCA                                                                                                         |
| sh-NC           | F:<br>GATCCGTTCTCCGAACGTGTCACGTTT<br>CAAGAGAACGTGACACGTTCCGGAGAA<br>CTTTTTTG<br>R:<br>AATTCAAAAAAGTTCTCCGAACGTGTC<br>ACGTTCTCTTGAAACGTGACACGTTTCG<br>GAGAACG |
| sh-lncKRT16P6   | F:<br>GATCCGCAATCAATACAGCTTCATTTC<br>AGAGAATGAAGCTGTATTGATTGCTTTT<br>TTG<br>R:<br>AATTCAAAAAAGCAATCAATACAGCTT<br>CATTCTCTTGAAATGAAGCTGTATTGAT<br>TGCG        |
| GATAD2A-si-1    | F: CCACAGCAUUAGGCAACAUTT<br>R: AUGUUGCCUAAUGCUGUGGTT                                                                                                         |
| GATAD2A-si-2    | F: GGCAGACAUUCUGAGAGAATT<br>R: UUCUCUCAGAAUGCUGCCTT                                                                                                          |

si, small interfering; sh short hairpin; NC, negative control; lnc, long noncoding; F, forward; R, reverse.

Table SIII. Sequence information of the fluorescence *in situ* hybridization probes.

| Probe              | Sequences (5'-3')             | Modification |
|--------------------|-------------------------------|--------------|
| lncKRT16P6 probe   | GT+TGT+TGG+TGCGAAGGACC+T      | 5'CY3        |
| lncKRT16P6 probe-1 | GAAG+TGCT+TAGGCGGCAGG+AGA     | 5'CY3        |
| 18S                | CTGCCTTCCTTGGATGTGGTAGCCGTTTC | 5'CY3        |
| NC                 | TGCTTTGCACGGTAACGCCTGTTTT     | 5'CY3        |

lnc, long noncoding; NC, negative control.
